# Supplementary material
Source: MDPI journal article supplement (https://www.mdpi.com/2073-445X/12/2/351)
Supplement: s1 [file s1]

## Supplementary materials

**Table S1.** Aboveground dry matter biomass (AGB) and leaf area index (LAI) collected in 2020 and 2021 in the two study-sites (sample mean and standard deviation of eight sub-samples in Marradi and four sub-samples in Borgo San Lorenzo).

| Var. | Site M (Marradi) |                                |      |                                | Site B (Borgo San Lorenzo) |                                |      |                                |      |                                |      |                                |
|------|------------------|--------------------------------|------|--------------------------------|----------------------------|--------------------------------|------|--------------------------------|------|--------------------------------|------|--------------------------------|
|      |                  |                                |      |                                | B1                         |                                |      |                                | B2   |                                |      |                                |
|      | 2020             |                                | 2021 |                                | 2020                       |                                | 2021 |                                | 2020 |                                | 2021 |                                |
|      | doy              | kg m <sup>-2</sup>             | doy  | kg m <sup>-2</sup>             | doy                        | kg m <sup>-2</sup>             | doy  | kg m <sup>-2</sup>             | doy  | kg m <sup>-2</sup>             | doy  | kg m <sup>-2</sup>             |
| AGB  | 139              | 0.22±0.08                      | 89   | 0.03±0.01                      | 131                        | 0.10±0.10                      | 62   | 0.03±0.02                      | 147  | 0.08±0.01                      | 62   | 0.04±0.02                      |
|      | 154              | 0.18±0.09                      | 138  | 0.09±0.04                      | 147                        | 0.04±0.05                      | 110  | 0.08±0.04                      | 161  | 0.13±0.04                      | 100  | 0.05±0.01                      |
|      | 167              | 0.12±0.06                      | 166  | 0.05±0.02                      | 161                        | 0.03±0.04                      | 125  | 0.08±0.02                      | 174  | 0.23±0.06                      | 125  | 0.08±0.03                      |
|      | 180              | 0.07±0.03                      | 202  | 0.03±0.02                      | 174                        | 0.02±0.02                      | 152  | 0.15±0.08                      | 188  | 0.15±0.06                      | 152  | 0.17±0.12                      |
|      | 194              | 0.05±0.02                      | 257  | 0.03±0.02                      | 188                        | 0.02±~0.00                     | 165  | 0.10±0.09                      | 202  | 0.19±0.11                      | 165  | 0.12±0.03                      |
|      | 209              | 0.04±0.02                      | -    | -                              | 202                        | 0.02±~0.00                     | 188  | 0.07±0.06                      | 286  | 0.04±0.03                      | 188  | 0.13±0.08                      |
|      | -                | -                              | -    | -                              | 286                        | 0.02±~0.00                     | 244  | 0.03±0.03                      | -    | -                              | 244  | 0.06±0.04                      |
|      | -                | -                              | -    | -                              | -                          | -                              | 287  | 0.01±0.01                      | -    | -                              | 287  | 0.03±0.02                      |
|      | doy              | m <sup>2</sup> m <sup>-2</sup> | doy  | m <sup>2</sup> m <sup>-2</sup> | doy                        | m <sup>2</sup> m <sup>-2</sup> | doy  | m <sup>2</sup> m <sup>-2</sup> | doy  | m <sup>2</sup> m <sup>-2</sup> | doy  | m <sup>2</sup> m <sup>-2</sup> |
| LAI  | 154              | 1.67±0.85                      | 89   | 0.72±0.27                      | 161                        | 0.42±0.44                      | 62   | 0.21±0.25                      | 161  | 1.30±0.84                      | 62   | 0.28±0.39                      |
|      | 167              | 1.20±0.55                      | 138  | 1.97±0.69                      | 174                        | 0.26±0.09                      | 110  | 1.27±1.12                      | -    | -                              | 110  | 0.80±0.44                      |
|      | 180              | 0.82±0.56                      | 166  | 1.12±0.69                      | 202                        | 0.12±0.12                      | 125  | 1.36±0.66                      | 188  | 2.56±1.21                      | 125  | 0.80±0.47                      |
|      | 194              | 0.58±0.28                      | -    | -                              | 286                        | 0.10±0.06                      | 152  | 2.55±1.79                      | 202  | 1.93±2.01                      | 152  | 2.46±1.59                      |
|      | 209              | 0.70±0.30                      | -    | -                              | -                          | -                              | 165  | 0.58±0.19                      | 286  | 0.52±0.40                      | 165  | 1.22±0.39                      |

**Table S2.** Climate models used in this study, an indication of their origin (institute), version, realisation and frequency. The suffixes i and p of each realisation (r) indicate the initialisation and physics indices, respectively.

| Institute   | Global Climate Model (GCM) | Experiment | Realisation | Regional Climate Model (RCM) | Frequency |
|-------------|----------------------------|------------|-------------|------------------------------|-----------|
| CLMcom      | CNRM-CERFACS-CNRM-CM5      | RCP4.5     | r1i1p1      | CLMcom-CCLM4-8-17            | day       |
|             |                            | RCP8.5     | r1i1p1      |                              | day       |
|             | ICHEC-EC-EARTH             | RCP4.5     | r12i1p1     |                              | day       |
|             |                            | RCP8.5     | r12i1p1     |                              | day       |
|             | MOHC-HadGEM2-ES            | RCP4.5     | r1i1p1      |                              | day       |
|             |                            | RCP8.5     | r1i1p1      |                              | day       |
|             | MPI-M-MPI-ESM-LR           | RCP4.5     | r1i1p1      |                              | day       |
|             |                            | RCP8.5     | r1i1p1      |                              | day       |
| DMI         | NCC-NorESM1-M              | RCP4.5     | r1i1p1      | DMI-HIRHAM5                  | day       |
|             |                            | RCP8.5     | r1i1p1      |                              | day       |
| IPSL-INERIS | IPSL-IPSL-CM5A-MR          | RCP4.5     | r1i1p1      | IPSL-INERIS-WRF331F          | day       |
|             |                            | RCP8.5     | r1i1p1      |                              | day       |
| KNMI        | ICHEC-EC-EARTH             | RCP4.5     | r1i1p1      | KNMI-RACMO22E                | day       |
|             |                            | RCP4.5     | r1i1p1      |                              | day       |
|             | MOHC-HadGEM2-ES            | RCP8.5     | r1i1p1      |                              | day       |
| MPI-CSC     | MPI-M-MPI-ESM-LR           | RCP4.5     | r1i1p1      | MPI-CSC-REMO2009             | day       |
|             |                            | RCP8.5     | r1i1p1      |                              | day       |
| SMHI        | CNRM-CERFACS-CNRM-CM5      | RCP4.5     | r1i1p1      | SMHI-RCA4                    | day       |

|                   |        |         |     |
|-------------------|--------|---------|-----|
|                   | RCP8.5 | r1i1p1  | day |
| ICHEC-EC-EARTH    | RCP4.5 | r12i1p1 | day |
|                   | RCP8.5 | r12i1p1 | day |
|                   | RCP4.5 | r1i1p1  | day |
| IPSL-IPSL-CM5A-MR | RCP8.5 | r1i1p1  | day |
|                   | RCP4.5 | r1i1p1  | day |
| MOHC-HadGEM2-ES   | RCP8.5 | r1i1p1  | day |
|                   | RCP4.5 | r1i1p1  | day |
| MPI-M-MPI-ESM-LR  | RCP8.5 | r1i1p1  | day |
|                   | RCP4.5 | r1i1p1  | day |

**Table S3.** Summary of the PaSim parameters considered for the calibration.

| Parameters                                                                                |                                                                                                                                                                                                                                                                           |                                        | Value  |
|-------------------------------------------------------------------------------------------|---------------------------------------------------------------------------------------------------------------------------------------------------------------------------------------------------------------------------------------------------------------------------|----------------------------------------|--------|
| Name                                                                                      | Description                                                                                                                                                                                                                                                               | Unit                                   |        |
| Canopy height parameter 1<br>( <i>hcanhalf</i> )                                          | This parameter expresses the leaf area index for which the canopy corresponds to half the maximum height.                                                                                                                                                                 | m <sup>2</sup> m <sup>-2</sup>         | 4      |
| Canopy height parameter 2<br>( <i>hcanmax</i> )                                           | This is the height of the flowering plant, the highest leaf not being elongated.                                                                                                                                                                                          | m                                      | 1.203  |
| Maximum specific leaf area<br>( <i>slam</i> )                                             | The maximum value of the specific leaf area is the maximum ratio of leaf area to dry weight, used to derive the canopy leaf area from the leaf biomass.                                                                                                                   | m <sup>2</sup> kg <sup>-1</sup>        | 27.2   |
| Light-saturated leaf photosynthetic rate for reproductive stage ( <i>pmco2rep</i> )       | They represent the influence of developmental stage on the photosynthetic rate of light-saturated leaves (defined under standard conditions of temperature and atmospheric CO <sub>2</sub> concentration), which is a component of the photosynthetic rate of the canopy. | μmol C m <sup>-2</sup> s <sup>-1</sup> | 12.88  |
| Light-saturated leaf photosynthetic rate for vegetative stage ( <i>pmco2veg</i> )         |                                                                                                                                                                                                                                                                           | μmol C m <sup>-2</sup> s <sup>-1</sup> | 9.49   |
| Root turnover parameter<br>( <i>kturnrt20</i> )                                           | It is the root turnover rate at 20 °C.                                                                                                                                                                                                                                    | d <sup>-1</sup>                        | 0.0155 |
| Shoot turnover parameter<br>( <i>kturnsh20</i> )                                          | It is the shoot turnover rate at 20 °C.                                                                                                                                                                                                                                   | d <sup>-1</sup>                        | 0.0468 |
| Parameter of the fractional N content of new plant structural dry matter ( <i>fhref</i> ) | This parameter is used to derive the nitrogen concentration of the newly produced structural dry matter.                                                                                                                                                                  | kg N kg <sup>-1</sup> DM               | 0.033  |
| Temperature dependence factor of the soil respiration<br>( <i>kfactor</i> )               | It multiplies the temperature-dependent function to estimate soil respiration.                                                                                                                                                                                            | -                                      | 2      |
| Relative root distribution ( <i>froot</i> )                                               | This is the relative dry matter of the roots in the different soil layers (one value per soil layer).                                                                                                                                                                     | %                                      | 0.095  |
|                                                                                           |                                                                                                                                                                                                                                                                           |                                        | 0.297  |
|                                                                                           |                                                                                                                                                                                                                                                                           |                                        | 0.238  |
|                                                                                           |                                                                                                                                                                                                                                                                           |                                        | 0.145  |

|                                                     |                                                                                                                                                                                                       |     |        |
|-----------------------------------------------------|-------------------------------------------------------------------------------------------------------------------------------------------------------------------------------------------------------|-----|--------|
|                                                     |                                                                                                                                                                                                       |     | 0.195  |
|                                                     |                                                                                                                                                                                                       |     | 0.030  |
| Base temperature ( $T_{base}$ )                     | This is the air temperature below which plant growth and development are nil.                                                                                                                         | K   | 277.94 |
| Normalisation factor for development ( $tasumrep$ ) | This parameter (which divides the sum of the thermal units) normalises the developmental stage index in such a way that a value 1 marks the transition from the reproductive to the vegetative stage. | K-d | 734.3  |

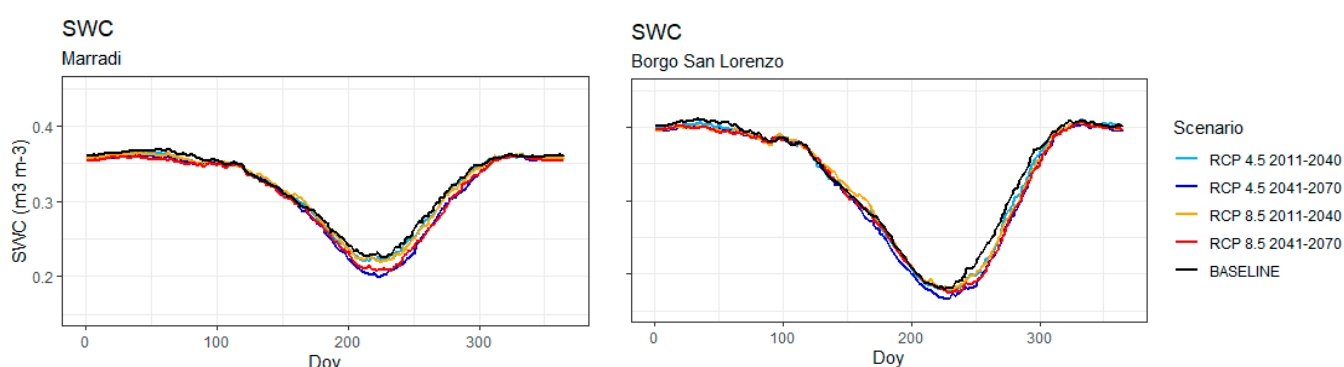

**Figure S1.** Daily simulation (30-year mean) of 0.35-m soil water content (SWC) with PaSim for baseline and climate-change scenarios under business-as-usual management at both study-sites. RCP4.5 and 8.5 are the different Representatives Concentration Pathways used in the simulations.

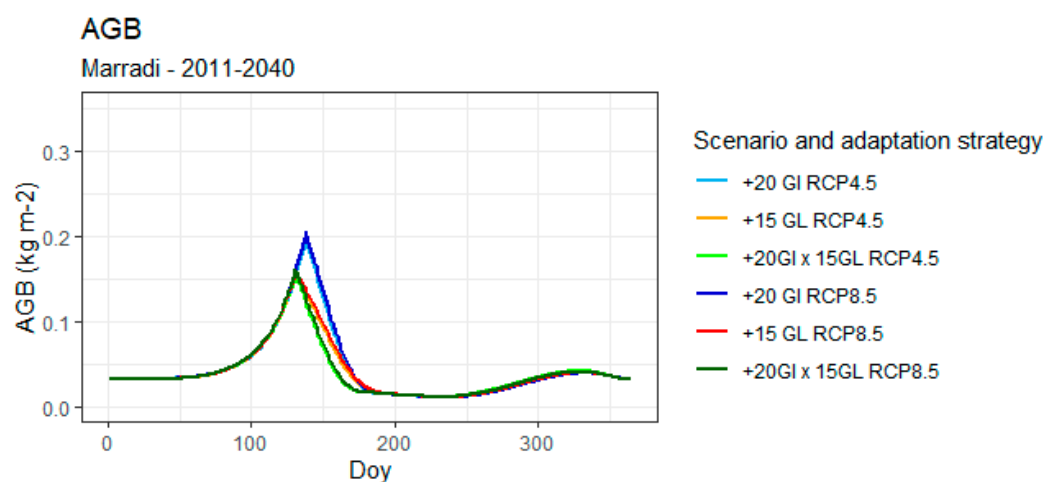

**Figure S2.** Daily simulation (30-year mean) of aboveground biomass (AGB) with PaSim for climate-change scenarios under different adaptation strategies at Marradi site for 2011-2040 period. +20 GI represent a 20% rise in animal stocking rate, 15 GL a 15% increase in grazing length and +20 GI×15 GL a combination of these two management factors. RCP4.5 and 8.5 are the different Representatives Concentration Pathways used in the simulations.

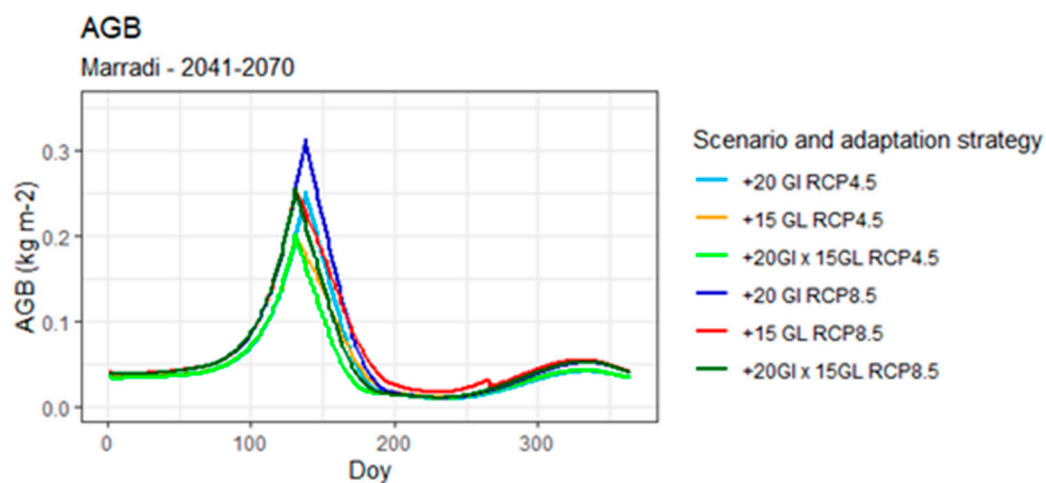

**Figure S3.** Daily simulation (30-year mean) of aboveground biomass (AGB) with PaSim for climate-change scenarios under different adaptation strategies at Marradi site for 2041-2070 period. +20 GI represent a 20% rise in animal stocking rate, 15 GL a 15% increase in grazing length and +20 GI×15 GL a combination of these two management factors. RCP4.5 and 8.5 are the different Representatives Concentration Pathways used in the simulations.

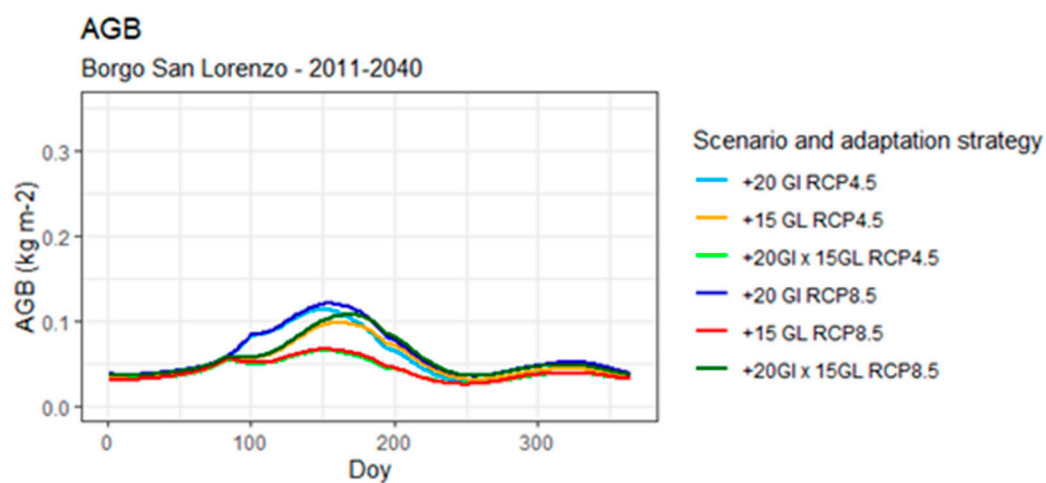

**Figure S4.** Daily simulation (30-year mean) of aboveground biomass (AGB) with PaSim for climate-change scenarios under different adaptation strategies at Borgo San Lorenzo site for 2011-2040 period. +20 GI represent a 20% rise in animal stocking rate, 15 GL a 15% increase in grazing length and +20 GI×15 GL a combination of these two management factors. RCP4.5 and 8.5 are the different Representatives Concentration Pathways used in the simulations.

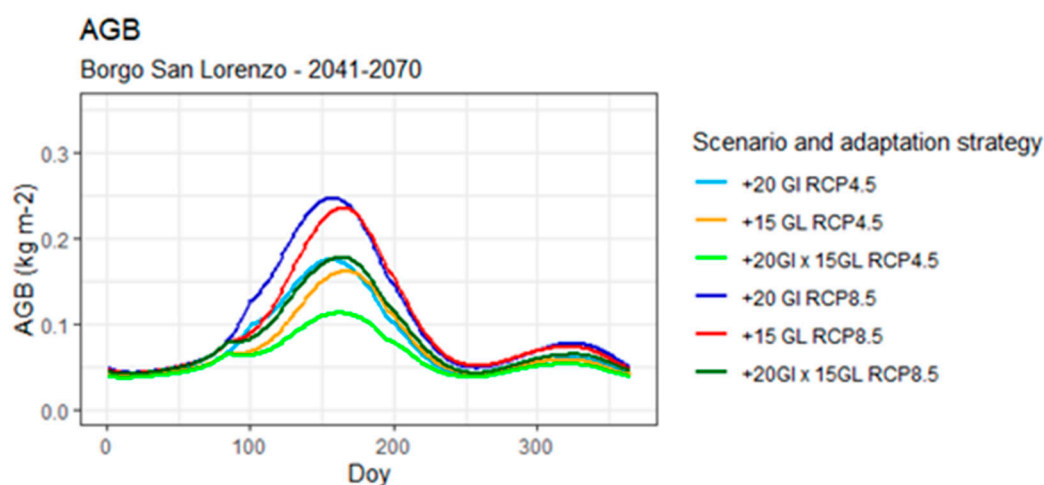

**Figure S5.** Daily simulation (30-year mean) of aboveground biomass (AGB) with PaSim for climate-change scenarios under different adaptation strategies at Borgo San Lorenzo site for 2041-2070 period. +20 GI represent a 20% rise in animal stocking rate, 15 GL a 15% increase in grazing length and +20 GI×15 GL a combination of these two management factors. RCP4.5 and 8.5 are the different Representative Concentration Pathways used in the simulations.

**Table S4.** Simulated flux components (30-year mean) from the two study-sites for the baseline (1981-2010) and climate scenarios (RCP4.5 and RCP8.5) under different management options, estimated using PaSim (GPP: gross primary production; RECO: ecosystem respiration; NEE: net ecosystem exchange). +20 GI represent a 20% rise in animal stocking rate, 15 GL a 15% increase in grazing length and +20 GI×15 GL a combination of these two management factors. RCP4.5 and 8.5 are the different Representative Concentration Pathways used in the simulations.

| Marradi        |           | CH <sub>4</sub> |        | N <sub>2</sub> O |        | GPP    |        | RECO   |        | NEE    |        |
|----------------|-----------|-----------------|--------|------------------|--------|--------|--------|--------|--------|--------|--------|
|                |           | RCP4.5          | RCP8.5 | RCP4.5           | RCP8.5 | RCP4.5 | RCP8.5 | RCP4.5 | RCP8.5 | RCP4.5 | RCP8.5 |
|                |           | Baseline        |        |                  |        |        |        |        |        |        |        |
| BAU            | Baseline  | 2.2             | 2.2    | 4.7              | 4.7    | 337.3  | 337.3  | 718.7  | 718.7  | 381.3  | 381.3  |
|                | 2011-2040 | 2.9             | 3.0    | 0.7              | 0.6    | 511.8  | 539.0  | 544.7  | 568.4  | 32.9   | 29.4   |
|                | 2041-2070 | 3.5             | 3.9    | 0.4              | 0.3    | 716.5  | 962.4  | 701.3  | 911.2  | -15.1  | -51.2  |
| +20 GI         | 2011-2040 | 2.7             | 2.9    | 0.7              | 0.7    | 469.5  | 491.3  | 505.0  | 523.9  | 35.5   | 32.6   |
|                | 2041-2070 | 3.3             | 3.8    | 0.4              | 0.4    | 621.5  | 813.6  | 616.3  | 784.0  | -5.2   | -29.6  |
| + 15 GL        | 2011-2040 | 2.6             | 2.8    | 0.7              | 0.6    | 434.9  | 456.5  | 471.5  | 491.4  | 36.6   | 34.9   |
|                | 2041-2070 | 3.4             | 4.0    | 0.4              | 0.3    | 602.1  | 837.0  | 595.4  | 797.0  | -6.8   | -39.9  |
| +20 GI x 15 GL | 2011-2040 | 2.5             | 2.6    | 0.7              | 0.7    | 404.2  | 422.2  | 443.1  | 459.6  | 38.9   | 37.3   |
|                | 2041-2070 | 3.2             | 3.8    | 0.4              | 0.4    | 535.5  | 716.8  | 534.7  | 693.4  | -0.8   | -23.4  |

| Borgo San Lorenzo |           | CH <sub>4</sub> |        | N <sub>2</sub> O |        | GPP    |        | RECO   |        | NEE    |        |
|-------------------|-----------|-----------------|--------|------------------|--------|--------|--------|--------|--------|--------|--------|
|                   |           | RCP4.5          | RCP8.5 | RCP4.5           | RCP8.5 | RCP4.5 | RCP8.5 | RCP4.5 | RCP8.5 | RCP4.5 | RCP8.5 |
|                   |           | Baseline        |        |                  |        |        |        |        |        |        |        |
| BAU               | Baseline  | 1.8             | 1.8    | 4.6              | 4.6    | 509.4  | 509.4  | 859.5  | 859.5  | 350.1  | 350.1  |
|                   | 2011-2040 | 2.2             | 2.3    | 0.8              | 0.8    | 714.5  | 792.0  | 737.0  | 807.2  | 22.5   | 15.2   |
|                   | 2041-2070 | 2.5             | 2.7    | 0.4              | 0.4    | 965.0  | 1258.1 | 932.3  | 1187.9 | -32.7  | -70.3  |
| +20 GI            | 2011-2040 | 2.4             | 2.5    | 0.7              | 0.7    | 610.3  | 679.6  | 632.9  | 695.8  | 22.6   | 16.2   |
|                   | 2041-2070 | 2.8             | 3.1    | 0.4              | 0.4    | 875.3  | 1185.0 | 844.7  | 1113.0 | -30.5  | -72.0  |
| + 15 GL           | 2011-2040 | 2.1             | 2.2    | 0.7              | 0.7    | 552.2  | 607.0  | 580.4  | 629.5  | 28.2   | 22.5   |
|                   | 2041-2070 | 2.5             | 2.8    | 0.4              | 0.4    | 807.3  | 1104.3 | 780.1  | 1036.3 | -27.3  | -68.0  |
| +20 GI x 15 GL    | 2011-2040 | 2.1             | 2.1    | 0.7              | 0.7    | 445.4  | 459.0  | 477.8  | 489.5  | 32.4   | 30.5   |

---

|           |     |     |     |     |       |       |       |       |       |       |
|-----------|-----|-----|-----|-----|-------|-------|-------|-------|-------|-------|
| 2041-2070 | 2.7 | 3.1 | 0.4 | 0.3 | 701.3 | 979.3 | 678.2 | 912.6 | -23.1 | -66.7 |
|-----------|-----|-----|-----|-----|-------|-------|-------|-------|-------|-------|

---
